# Supplementary material for: Anomalous intense emission of the 5D0/7F4 transition for reddish-orange light-emitting and fluorescent probe for multiple lattice sites in β-PbF2:Eu3+/K+ oxyfluoride glass ceramics
Source: Royal Society of Chemistry journal article supplement (doi:10.1039/d4nj01481b), 2024-01-01
Supplement: d4nj01481b1.pdf [file d4nj01481b1.pdf]

**Electronic Supplementary Information (ESI) available:**

Anomalous intense emission of the  $^5D_0/{}^7F_4$  transition for reddish orange light-emitting and fluorescent probe for multiple lattice sites in  $\beta$ -PbF<sub>2</sub>:Eu<sup>3+</sup>/K<sup>+</sup> oxyfluoride glass ceramics

Kejie Xu<sup>a</sup>, Lijuan Zhao<sup>b</sup>, Yuao Guo<sup>\*a</sup>, Yuting Fu<sup>\*a</sup>

*<sup>a</sup>School of electronic information, Huzhou College, 313000, China.*

*E-mail: guoyuao@zjhzu.edu.cn fuyuting@zjhzu.edu.cn*

*<sup>b</sup>Key Laboratory of Weak-Light Nonlinear Photonics, Ministry of Education, School of Physics, Nankai University, Tianjin 300071, China.*

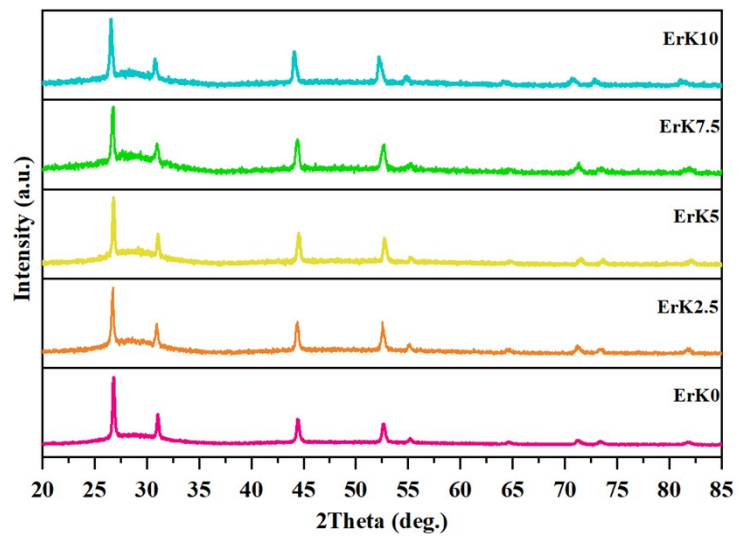

**Figure S1.** XRD pattern of  $\beta$ -PbF<sub>2</sub>:Er<sup>3+</sup>/K<sup>+</sup> GCs varying with K<sup>+</sup> concentration.
